# Supplementary material for: Quantitative and Qualitative Analysis of the Anti-Proliferative Potential of the Pyrazole Scaffold in the Design of Anticancer Agents
Source: MDPI journal article supplement (doi:10.3390/molecules27103300), 2022-05-20
Supplement: s1 [file s1]

*Supplementary Materials*

# **Quantitative and Qualitative Analysis of the Anti-Proliferative Potential of the Pyrazole Scaffold in the Design of Anticancer Agents**

**George Mihai Nitulescu**

Faculty of Pharmacy, "Carol Davila" University of Medicine and Pharmacy, Traian Vuia 6, 020956 Bucharest, Romania; [george.nitulescu@umfcd.ro](mailto:george.nitulescu@umfcd.ro)

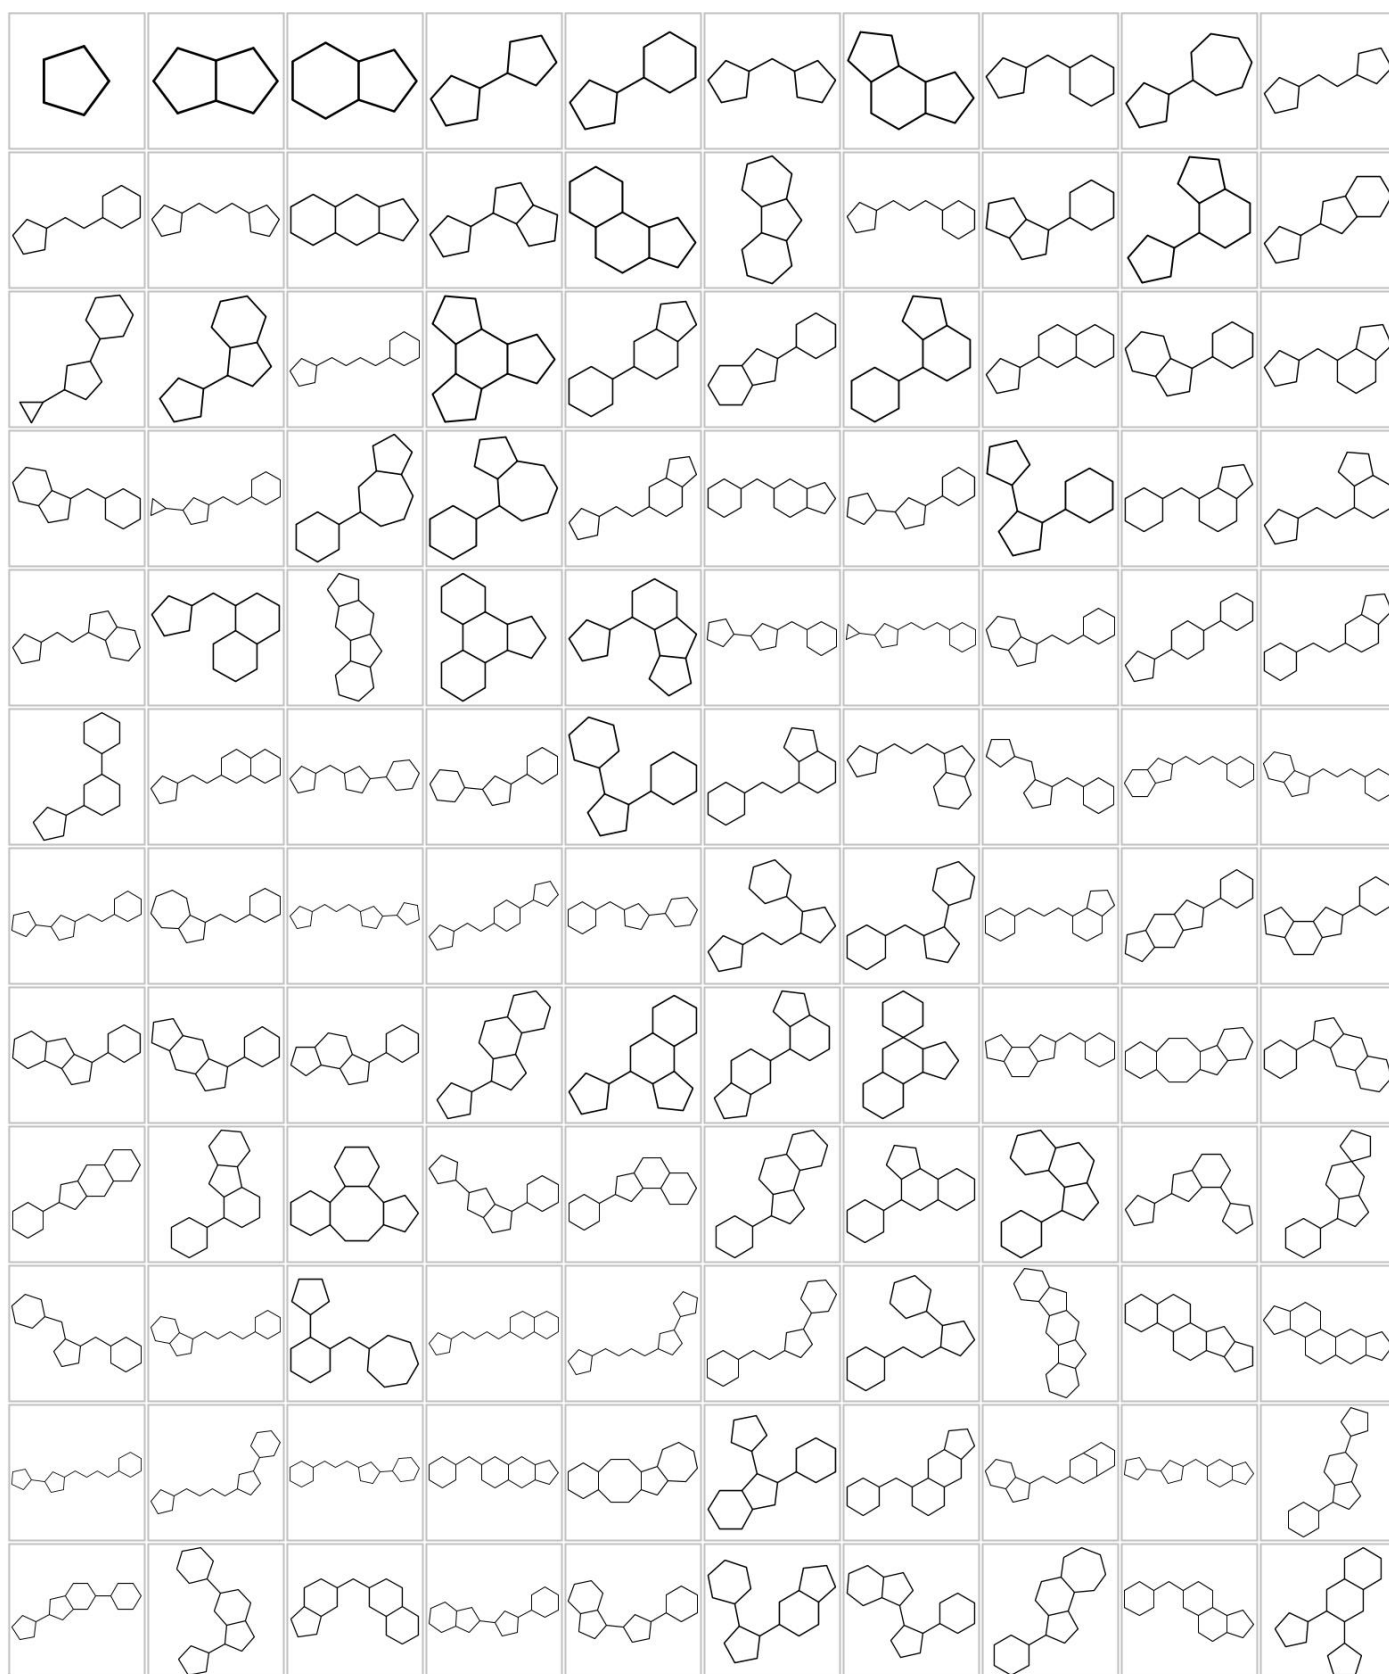

**Figure S1.** The list of the BM the Bemis–Murcko (BM) skeletons. Part 1.

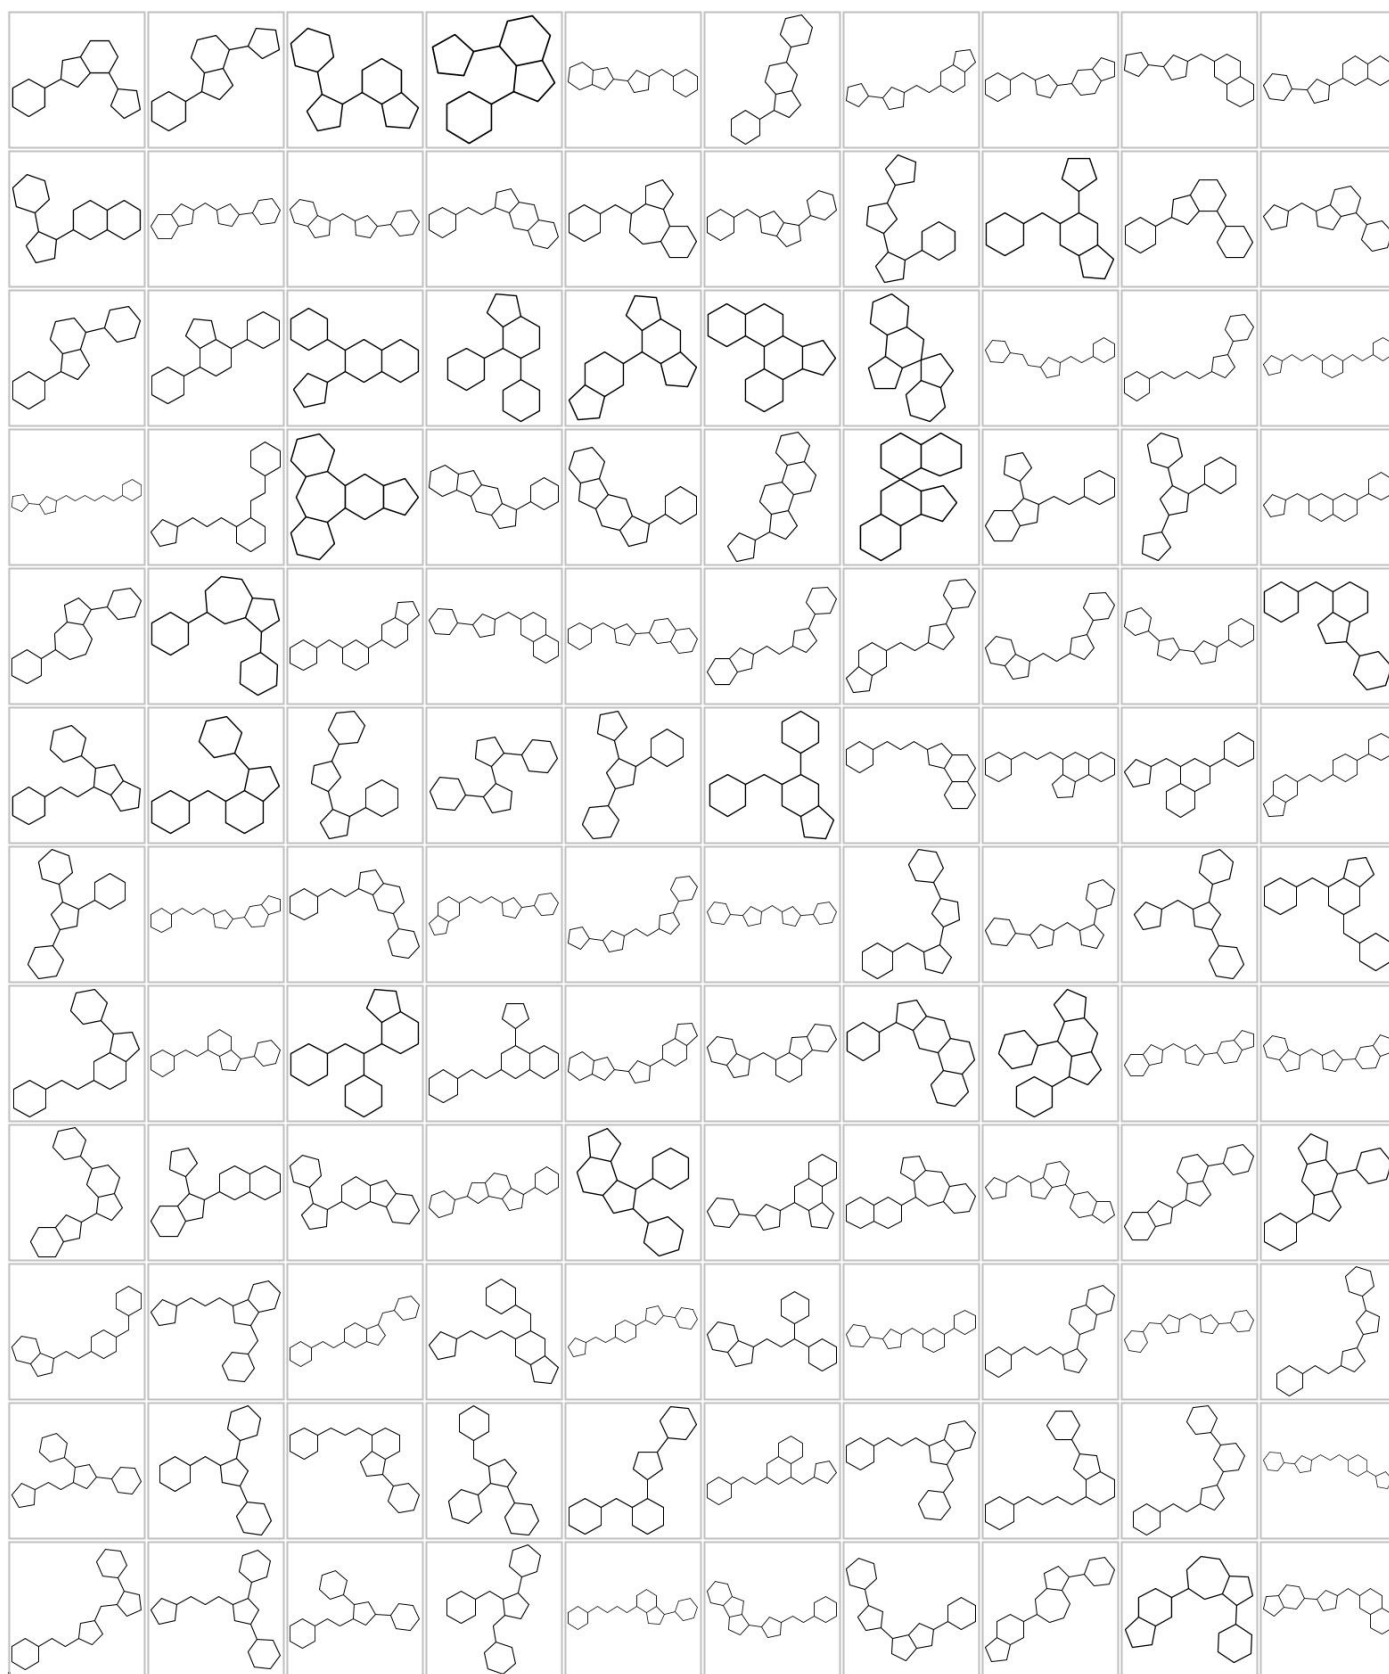

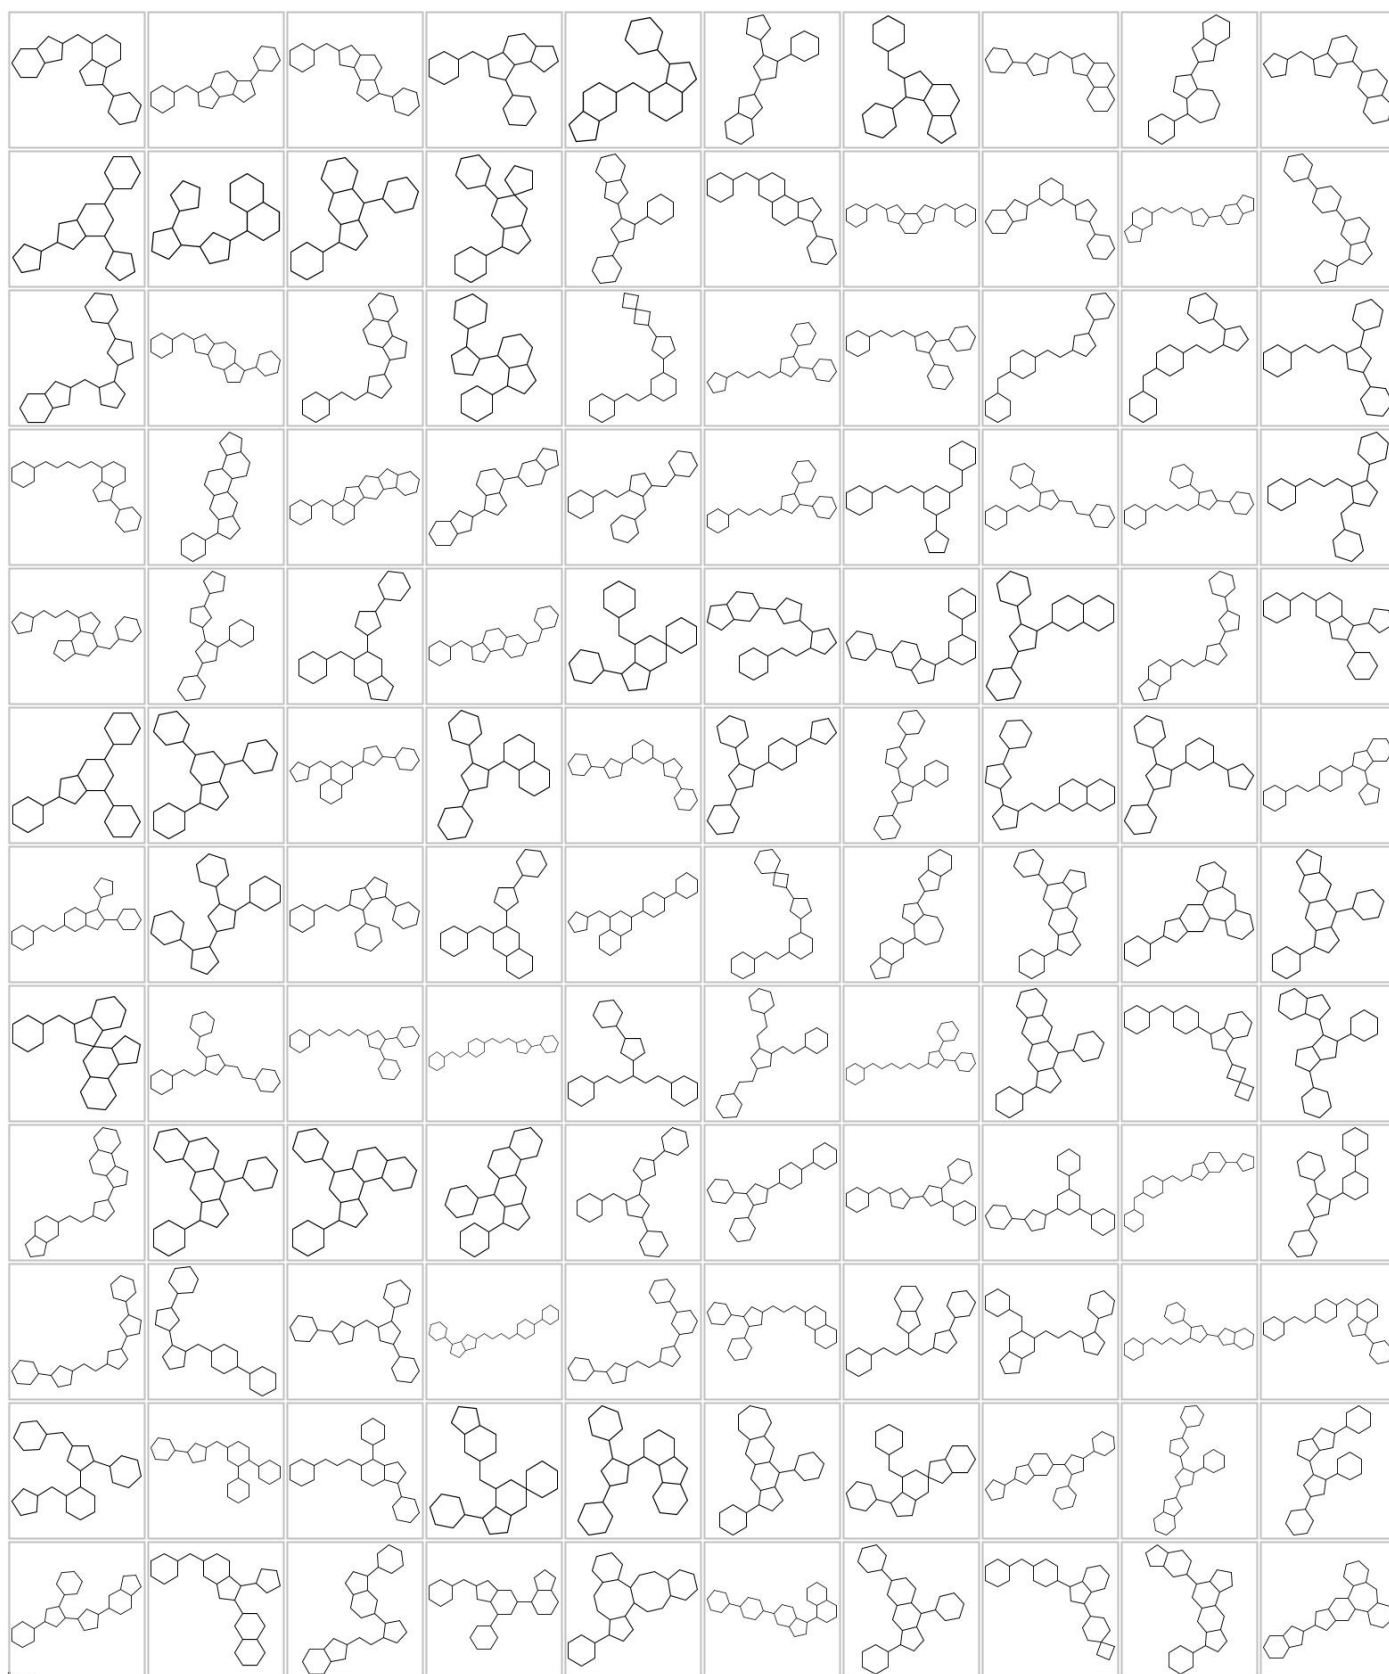

**Figure S3.** The list of the BM the Bemis–Murcko (BM) skeletons. Part 3.

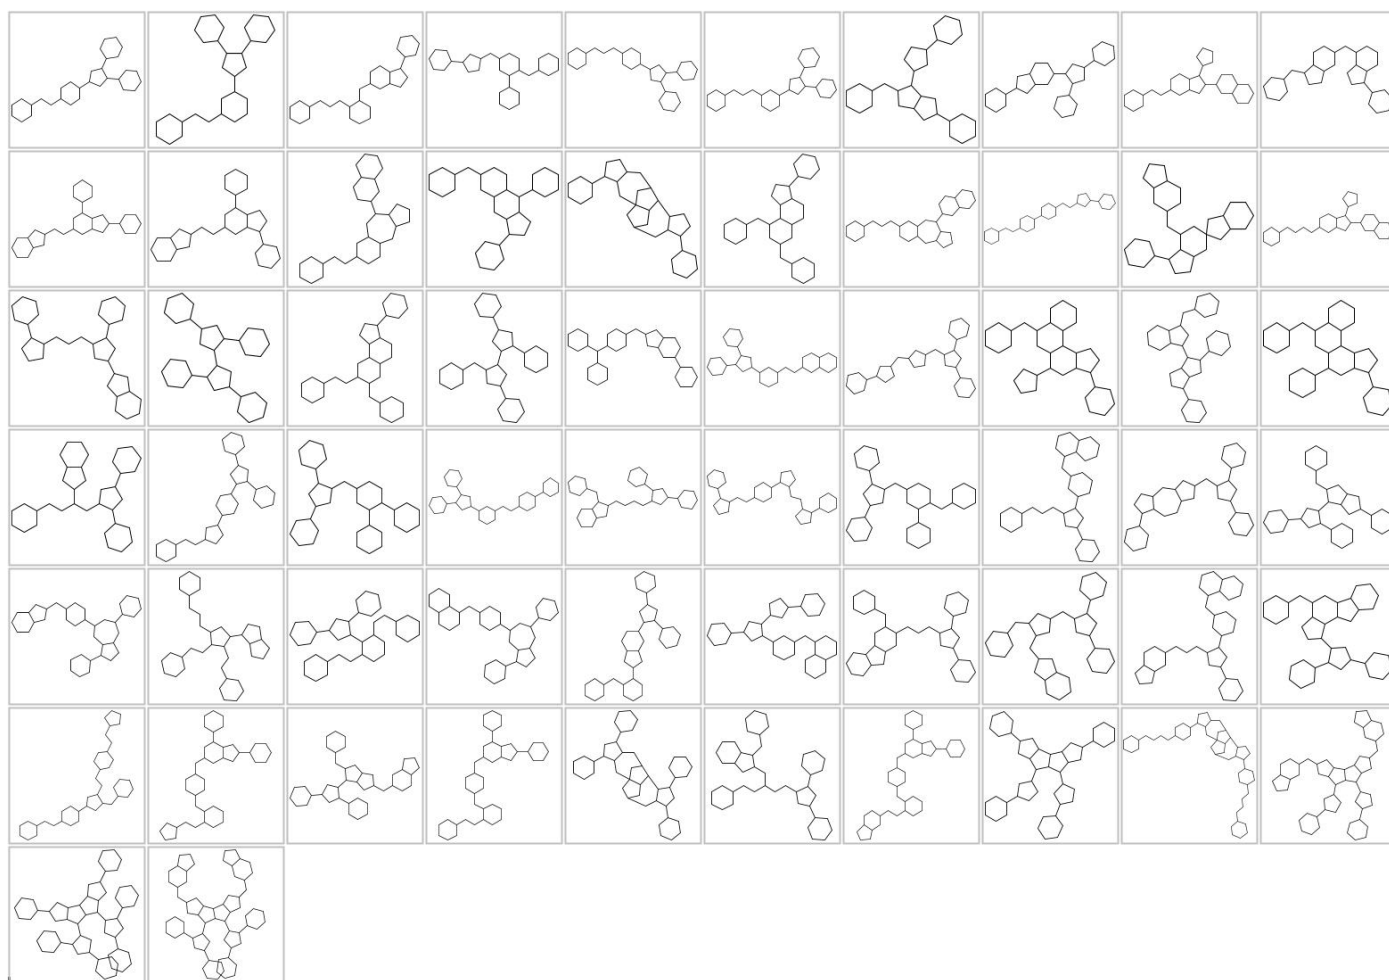

**Figure S4.** The list of the BM the Bemis–Murcko (BM) skeletons. Part 4.
